# Supplementary material for: Clonal transitions and phenotypic evolution in Barrett esophagus
Source: bioRxiv or medRxiv preprint supplement (doi:10.1101/2021.03.31.21252894), 2021-04-06
Supplement: Supplementary file [file media-2.pdf]

### Characteristics of the primary antibodies used for IHC

| Antibody           | Source                  | Host/Isotype          | Dilution<br>FFPE | Dilution<br>FF | Secondary         | Tertiary |
|--------------------|-------------------------|-----------------------|------------------|----------------|-------------------|----------|
|                    |                         |                       |                  |                |                   |          |
| Pepsinogen         | Abcam                   | Mouse/IgG1            | 1:700            | N/A            | Goat anti mouse   | AP/Blue  |
| H+K+ATPase         | DAKO                    | Mouse/IgG1            | 1:1000           | 1:4000         | Goat anti mouse   | HRP/DAB  |
| MUC5AC             | Abcam                   | Mouse/IgG1            | 1:500            | 1:50/<br>1:100 | Goat anti mouse   | HRP/DAB  |
| MUC2               | ThermoFisher Scientific | Mouse/IgG1            | 1:500            | 1:200          | Goat anti mouse   | AP/Blue  |
| Defensin6 $\alpha$ | Sigma                   | Rabbit/<br>Polyclonal | 1:5000           | N/A            | Swine anti rabbit | AP/Blue  |
| Defensin5 $\alpha$ | Abcam                   | Mouse/IgG1            | N/A              | 1:100          | Rabbit anti mouse | HRP/DAB  |

Supplemental table 1. Antibody sources, dilutions and processing used within this manuscript. FFPE= formalin fixed paraffin embedded, FF= fresh frozen and N/A = not applicable; antibody not used for this purpose. AP= alkaline phosphatase and HRP= horseradish peroxidase.
